# Supplementary material for: Facile synthesis, characterization, mechanism and enhanced visible-light photocatalytic activity of SiW12/α-Fe2O3 nanocomposites
Source: Royal Society of Chemistry journal article supplement (doi:10.1039/d1nj00021g), 2021-01-01
Supplement: d1nj00021g1.pdf [file d1nj00021g1.pdf]

## Supporting information

### Facile synthesis, characterization, mechanism and enhanced visible-light photocatalytic activity of $\text{SiW}_{12}/\alpha\text{-Fe}_2\text{O}_3$ nanocomposite

Haihui Yu<sup>\*a</sup>, Bing Wei<sup>a</sup>, Junping Wang<sup>a</sup>, Haiqi Zhao<sup>a</sup>, Sai Zeng<sup>a</sup>, Chaobo Xue<sup>a</sup>, Jiayu Zhu<sup>a</sup>, Yanlin Zhang<sup>a</sup>, Peng Xu<sup>\*b</sup>

<sup>a</sup> School of Chemical Engineering, Northeast Electric Power University, Jilin 132000, P. R. China  
E-mail: hhyu@neepu.edu.cn

<sup>b</sup> Co-Innovation Center for Efficient Processing and Utilization of Forest Products, College of Chemical Engineering, Nanjing Forestry University, Nanjing 210037, P. R. China.  
E-mail: xupeng@njfu.edu.cn

### Experimental

All of the chemicals used are analytic grade without any further purification.

#### Synthesis of Samples

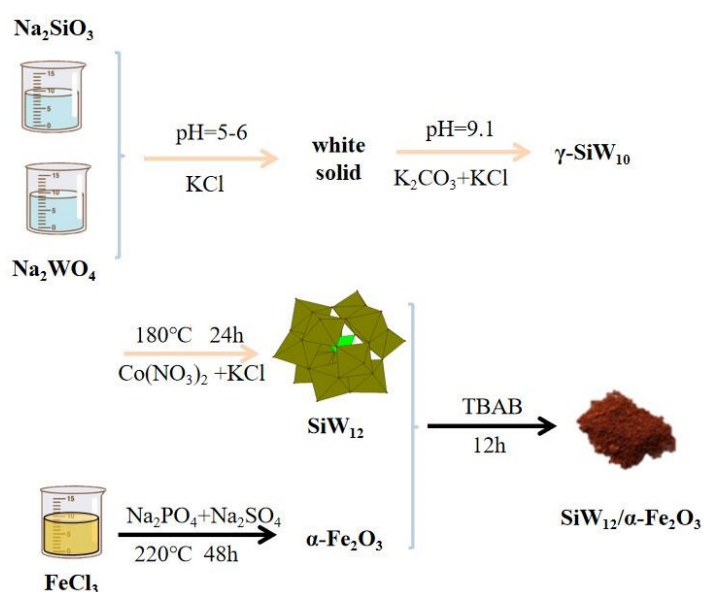

Scheme S1: the preparation process of  $\text{SiW}_{12}/\alpha\text{-Fe}_2\text{O}_3$  nanocomposite

#### Synthesis of 3D open-framework structure $\text{SiW}_{12}$ precursor<sup>1-3</sup>

5.00 mmol  $\text{Na}_2\text{SiO}_3$  was dissolved in 10 mL deionized water (recorded as liquid A). 55 mmol  $\text{Na}_2\text{WO}_4$  was dissolved in 30 mL deionized water (recorded as liquid B). When solution B is completely dissolved, a certain concentration of  $\text{HCl}$  is added to adjust the pH value to 5-6, and then liquid A was added. The mixture solution was proceed for 100min under vigorous stirred. Then a certain amount of  $\text{KCl}$  was added and white precipitation was separated by centrifugation.

The filtered white product was dissolved in 85 ml water, the insoluble substance was filtered out, the pH was adjusted to 9.1 by 2M  $\text{K}_2\text{CO}_3$ , and kept it unchanged for 16 minutes. Then  $\text{KCl}$  (0.27mmol) was added, the white solid was separated for 10 minutes, and the white powder was obtained by drying.

0.75g  $\gamma$ -SiW<sub>10</sub> powder were dissolved in 10 mL 0.5M potassium chloride solution. 4M nitric acid was added under full stirring and adjusted the pH to 1. Cobalt nitrate 2mmol was added after the precursor was dissolved, and the reaction was carried out in 180 degree Teflon-lined autoclave for 24 hours, then the reaction solution was transferred to a beaker. The golden rod-like crystal is produced after about one week.

#### Synthesis of $\alpha$ -Fe<sub>2</sub>O<sub>3</sub> nanorings<sup>4</sup>

FeCl<sub>3</sub> (2.67 mmol), NaH<sub>2</sub>PO<sub>4</sub> (0.015 mmol) and Na<sub>2</sub>SO<sub>4</sub> (0.045 mmol) were dissolved in 80 ml deionized water in turn, respectively. The solution was fully stirred 40min and then transferred to the reactor of Teflon-lined autoclave. The reaction lasted for 48 hours at 220 °C. The red product was obtained and washed by water and alcohol repeatedly.

#### Reference:

- 1 J. Canny, A. Teze, R. Thouvenot, et al., *Inorg. Chem.*, 1986, 25(13):2114-2119.
- 2 A. Tézé, G. Hervé, *Journal of Inorganic & Nuclear Chemistry*, 1977, 39(12): 2151-2154.
- 3 E. O. North, J. C. Bailar, F. G. Jonelis, *Inorganic Syntheses*, Volume 1. 2007.
- 4 C. L. Jia, L. D. Sun, C. H. Yan, et al., *J. Am. Chem. Soc.*, 2008, 130(50):16968-16977.

#### Characterization

The structure and composition of the samples are characterized by FT-IR (Affinity-1 of Shimadzu), X-ray powder diffraction (XRD) collected on Shimadzu powder diffractometer with Cu K $\alpha$  radiation, ( $\lambda=0.15405\text{nm}$ ). XPS the UV-vis diffused reflectance spectra were recorded on UV-2550, Shimadzu, Japan. The morphologies of the samples are observed by Scanning electron microscopy (SEM) ZEISS SUPRA55, and the EIS test using Princeton electrochemical workstation. Three-electrode system was used in the test. The mixed solution was 75 mL 0.05 mol/L potassium ferricyanide and 75 mL 0.1 mol/L potassium chloride. Cyclic voltammetry also uses the above test conditions.

#### Photocatalytic activity

100mL 10mg / L MB was transferred into the photocatalytic reactor as the initial solution, and the pH value was adjusted by HCl. The amount of photocatalyst is 0.1g. The photocatalyst is adsorbed by dark light for 30 min before photocatalysis, and then the xenon lamp is turned on for photocatalysis (illumination: 18.085 mW/cm<sup>2</sup>). Take samples every 10 minutes, 9 times in total. The photocatalysis experiment of different mineralization degree is basically the same as this, only adding different concentration of sodium chloride into the initial solution. Three different masking agents were used to mask the active components, isopropanol to mask the photogenerated holes, triethanolamine to mask the hydroxyl radicals, and benzoquinone to mask the superoxide radicals. The dosage of isopropanol and triethanolamine is 1ml. The dosage of p-benzoquinone was 0.05g.

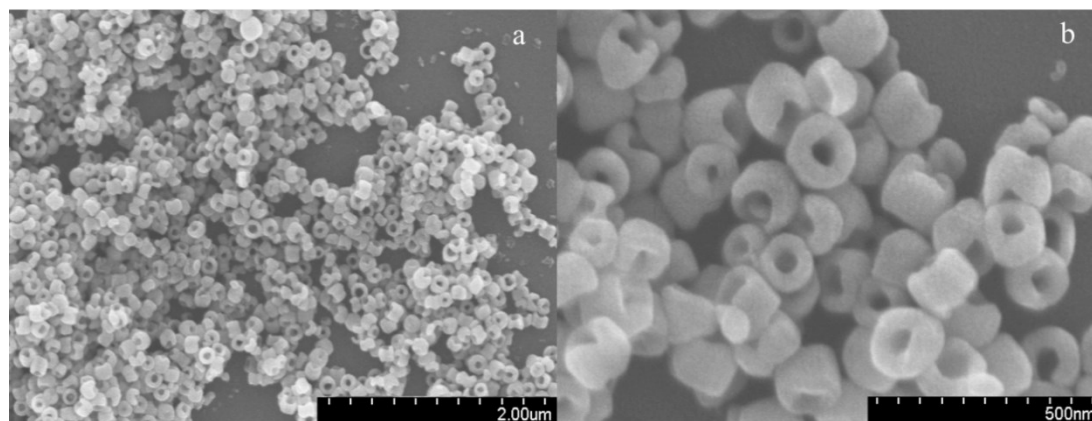

Fig.S1 SEM images of  $\alpha$ -Fe<sub>2</sub>O<sub>3</sub> nanoring

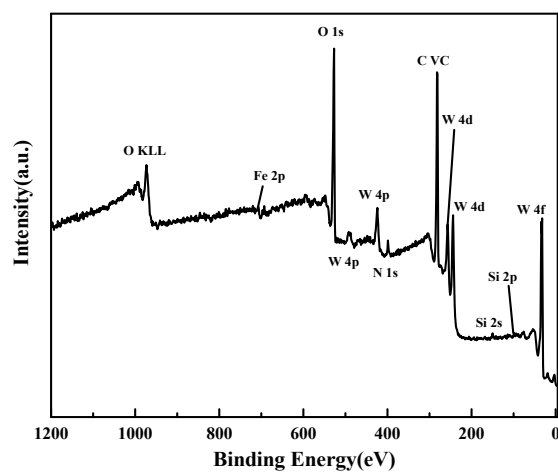

Fig.S2 The full survey spectrum of the  $\text{SiW}_{12}/\alpha\text{-Fe}_2\text{O}_3$  composite

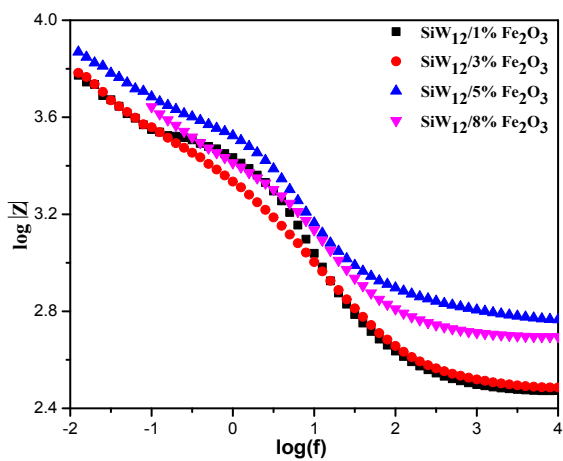

Fig.S3 The Bode plots of composites with different amount of  $\text{Fe}_2\text{O}_3$

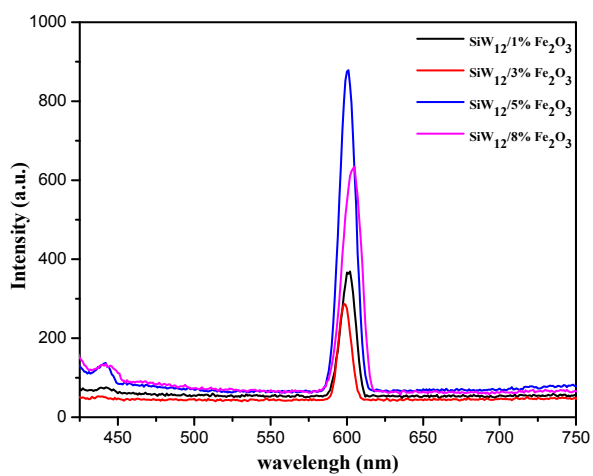

Fig.S4 The PL spectra of composites with different amount of  $\text{Fe}_2\text{O}_3$

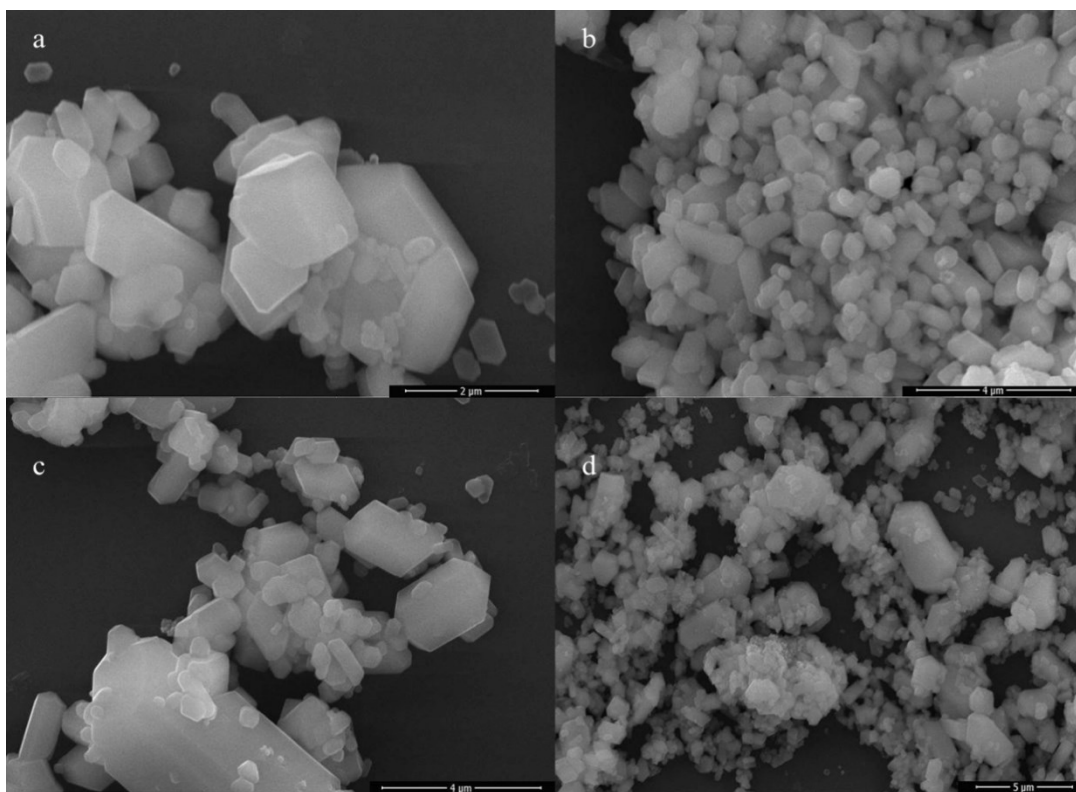

Fig.S5 SEM images of  $\text{SiW}_{12}/\alpha\text{-Fe}_2\text{O}_3$  with different ratio (a)  $\text{SiW}_{12}/1\%\alpha\text{-Fe}_2\text{O}_3$ , TBAB 10ml. (b)  $\text{SiW}_{12}/3\%\alpha\text{-Fe}_2\text{O}_3$ , TBAB 10ml. (c)  $\text{SiW}_{12}/5\%\alpha\text{-Fe}_2\text{O}_3$ , TBAB 10ml. (d)  $\text{SiW}_{12}/8\%\alpha\text{-Fe}_2\text{O}_3$ , TBAB 10ml

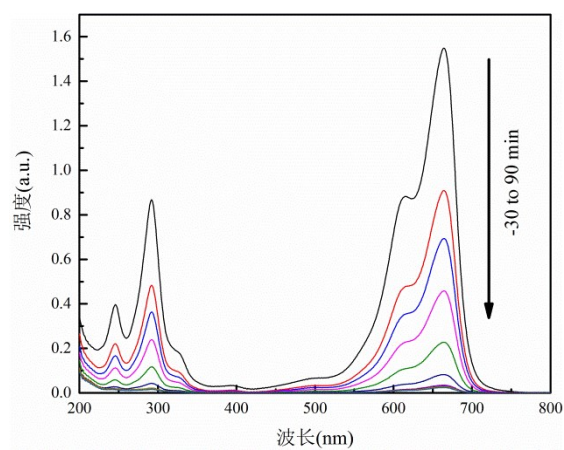

Fig.S6 The profiles of photocatalytic performance of  $\text{SiW}_{12}/3\%\alpha\text{-Fe}_2\text{O}_3$

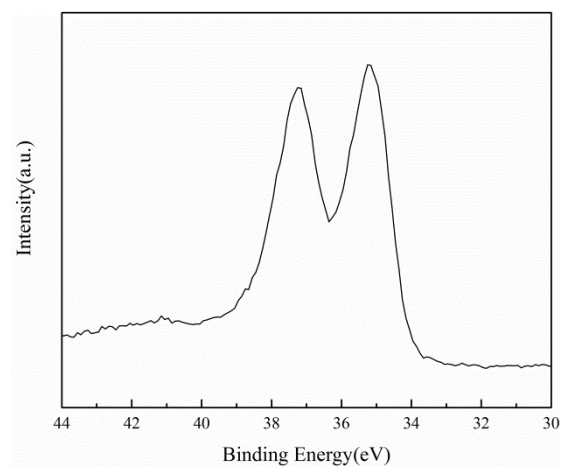

Fig.S7 XPS spectrum for W of the composite after the photocatalytic degradation

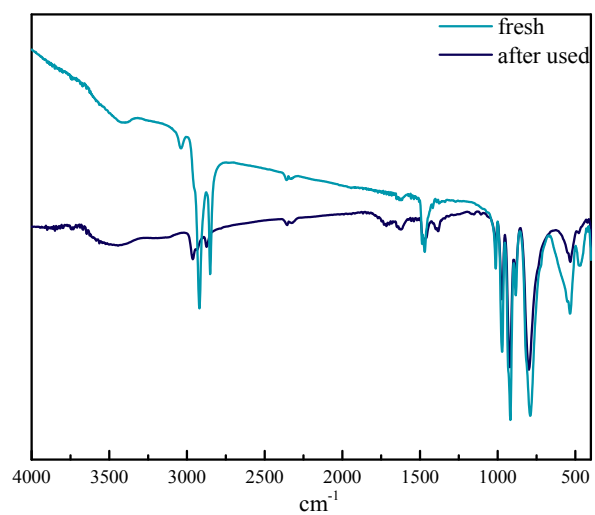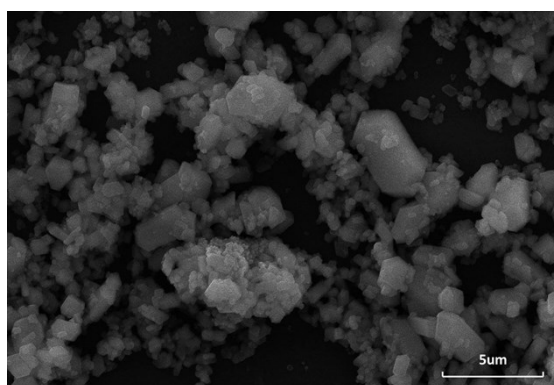

Fig. S8 The IR spectra and SEM image of the  $\text{SiW}_{12}/3\%\alpha\text{-Fe}_2\text{O}_3$  composite after photocatalytic degradation

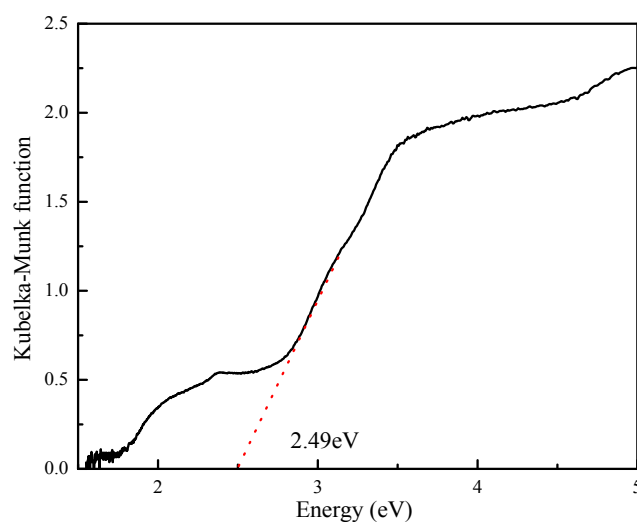

Fig S9 K-M function against energy E of  $\text{SiW}_{12}$  polyoxometalate

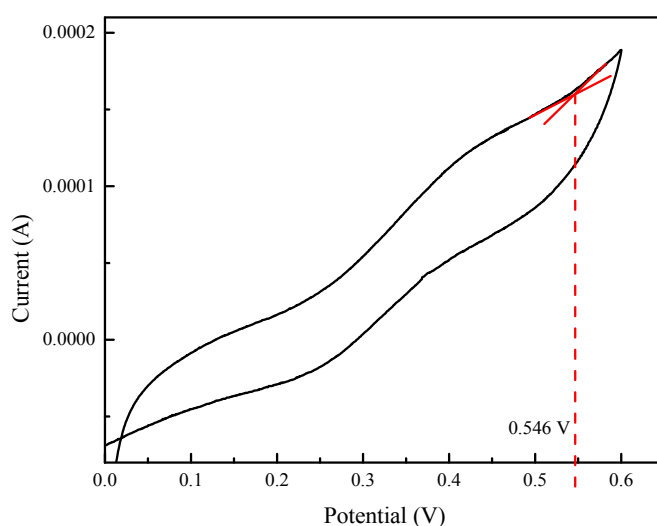

Fig S10 The cyclic voltammograms of  $\text{SiW}_{12}$  polyoxometalate

The LUMO and HOMO positions are determined by CV test and UV-vis diffuse reflectance spectra methods. The band gap  $E_g$  of  $\text{SiW}_{12}$  polyoxoanion was estimated to be 2.49 eV from the K-M function (Fig. S10), and the LUMO of  $\text{SiW}_{12}$  polyoxoanion is about 0.79V ( $E_{\text{LUMO}} = 0.241 \text{ V} + 0.546 \text{ V}$ ) according to result of cyclic voltammetry (Fig. S11). Thus, the HOMO of  $\text{SiW}_{12}$  polyoxoanion is calculated to be 3.28 V ( $E_{\text{HOMO}} = E_{\text{LUMO}} + E_g$ ).

Table S1 The comparison of MB degradation activity of SiW<sub>12</sub>/3% $\alpha$ -Fe<sub>2</sub>O<sub>3</sub> with literature.

| Photocatalyst                                                                                                                                                                           | Concentration<br>(mg·L <sup>-1</sup> ) | Dosage<br>(g·L <sup>-1</sup> ) | Time<br>(min) | Remove<br>(%) | Light Source                                            | Reference |
|-----------------------------------------------------------------------------------------------------------------------------------------------------------------------------------------|----------------------------------------|--------------------------------|---------------|---------------|---------------------------------------------------------|-----------|
| Fe <sub>2</sub> O <sub>3</sub>                                                                                                                                                          | 10                                     | 0.5                            | 120           | 73            | 200W Xe lamp<br>$\lambda > 420$ nm                      | 1         |
| K <sub>8</sub> /EuW <sub>10</sub>                                                                                                                                                       | 2                                      | 0.25                           | 2880          | 91            | 200W Xe lamp<br>$\lambda$ 400-700 nm                    | 2         |
| TiO <sub>2</sub>                                                                                                                                                                        | 4                                      | 1                              | 50            | 70            | 9W UVP lamp<br>$\lambda$ =360-400 nm                    | 3         |
| TiO <sub>2</sub>                                                                                                                                                                        | 13.5                                   | 0.2                            | 60            | 78            | 100W UV lamp<br>$\lambda$ =365nm                        | 4         |
| CdS@ZIF-8                                                                                                                                                                               | 10                                     | 1                              | 120           | 72            | 500W Osram UV<br>$\lambda > 420$ nm                     | 5         |
| FeWO <sub>4</sub> @ZnWO <sub>4</sub> /ZnO                                                                                                                                               | 10                                     | 1                              | 240           | 76            | 100W Osram UV<br>lamp $\lambda > 420$ nm                | 6         |
| Mg-Doped ZnO                                                                                                                                                                            | 3.4                                    | 1.2                            | 10            | 83.3          | Simulated sunlight                                      | 7         |
| [Cu <sub>8</sub> L <sub>8</sub> [Mo <sub>12</sub> O <sub>46</sub><br>(AsPh) <sub>4</sub> ] <sub>2</sub> ·H <sub>2</sub> O                                                               | 3.4                                    | 0.35                           | 180           | 70            | 100W Xe lamp<br>$\lambda > 420$ nm                      | 8         |
| [Cu <sub>4</sub> (L <sub>3</sub> ) <sub>4</sub> Mo <sub>6</sub> O <sub>18</sub><br>(O <sub>3</sub> AsPh) <sub>2</sub> ]                                                                 | 16.9                                   | 0.35                           | 120           | 97            | 125W<br>UV                                              | 9         |
| [Ag <sub>10</sub> (pytz- II) <sub>6</sub><br>(trz) <sub>2</sub> (H <sub>2</sub> O) <sub>6</sub> ]<br>[HP <sub>2</sub> W <sub>18</sub> O <sub>62</sub> ] <sub>2</sub> ·8H <sub>2</sub> O | 3.4                                    | 0.5                            | 120           | 74            | 125W<br>UV                                              | 10        |
| Fe <sub>2</sub> O <sub>3</sub> /TiO <sub>2</sub>                                                                                                                                        | 25                                     | 25                             | 180           | 94            | 300W Osram UV<br>$\lambda > 420$ nm                     | 11        |
| SnO <sub>2</sub> /Fe <sub>2</sub> O <sub>3</sub>                                                                                                                                        | 10                                     | 1                              | 240           | 98.4          | 125W Hg lamp                                            | 12        |
| SiW <sub>12</sub> /3% $\alpha$ -Fe <sub>2</sub> O <sub>3</sub>                                                                                                                          | 10                                     | 0.1                            | 90            | 97.8          | 18.085 mW/cm <sup>2</sup><br>Xe lamp $\lambda > 420$ nm | This work |

- [1] M. Zong, D. Song, X. Zhang, et al., Environmental Science and Technology, 2021, 55(1):677-688
- [2] L. Tong, Z. Wang, C. Xia, et al., Journal of Physical Chemistry B, 2017, 121(46):10566-10573
- [3] H. Maleki, V. Bertola, ACS Applied Nano Materials, 2019, 2(11):7237-7244
- [4] J. Harris, R. Silk, M. Smith, et al., ACS Omega, 2020, 5, 18919-18934
- [5] M. Ankur, N. Mala, M. Shanid, et al., Acs Omega, 2018, 3(7):8288-8308.
- [6] F. Wang, W. Li, S. Gu, et al., ACS Sustainable Chemistry & Engineering, 2016, 4(12):6288-6298
- [7] V. Etacheri, R. Roshan, V. Kumar. ACS Applied Materials & Interfaces, 2012, 4(5):2717-2725
- [8] B. Liu, Z. T. Yu, J. F. Ma, Inorg. Chem., 2011, 50(18):8967-8972
- [9] B. Liu, J. Yang, J. F. Ma, et al. Inorganic Chemistry:2013, 52(1):84-94.
- [10] P. Zhu, L. Sun, N. Sheng, et al., Crystal Growth & Design, 2016, 16(6):3215-3223
- [11] R. Li, Y. Jia, N. Bu, et al. Journal of Alloys and Compounds, 2015, 643:88-93.
- [12] S W Zhang, J X Li, H H Niu, et al., Chempluschem, 2013, 78(2):192-199.
